# Supplementary material for: Animals in higher education settings: Do animal-assisted interventions improve mental and cognitive health outcomes of students? A systematic review and meta-analysis
Source: bioRxiv or medRxiv preprint supplement (doi:10.1101/2022.04.11.22273607), 2022-04-16
Supplement: Supplementary file [file media-1.pdf]

| <b>PICOS criteria</b> | <b>Eligibility criteria</b>                                                                                                                                                                                                                                                                                                                                 |
|-----------------------|-------------------------------------------------------------------------------------------------------------------------------------------------------------------------------------------------------------------------------------------------------------------------------------------------------------------------------------------------------------|
| <b>Population</b>     | <ul style="list-style-type: none"> <li>• Participants are students of a higher education institution</li> <li>• Participants can be with or without pre-existing health conditions</li> </ul>                                                                                                                                                               |
| <b>Intervention</b>   | <ul style="list-style-type: none"> <li>• Using a live animal</li> <li>• Using an animal that is unfamiliar to participants</li> <li>• Animal is the sole intervention tool</li> <li>• Intervention takes place in a higher education setting</li> <li>• Aim of the intervention is to improve any mental health or cognitive outcome of students</li> </ul> |
| <b>Control</b>        | <ul style="list-style-type: none"> <li>• Presence of a parallel control group<sup>a</sup></li> </ul>                                                                                                                                                                                                                                                        |
| <b>Outcome</b>        | <ul style="list-style-type: none"> <li>• Any mental health outcomes</li> <li>• Any cognitive outcomes</li> </ul>                                                                                                                                                                                                                                            |
| <b>Study design</b>   | <ul style="list-style-type: none"> <li>• Study design must be RCT or crossover RCT with a parallel control group</li> <li>• Study design must include true randomization<sup>b</sup></li> <li>• Published in a peer-reviewed journal</li> </ul>                                                                                                             |
