# Supplementary material for: Animals in higher education settings: Do animal-assisted interventions improve mental and cognitive health outcomes of students? A systematic review and meta-analysis
Source: bioRxiv or medRxiv preprint supplement (doi:10.1101/2022.04.11.22273607), 2022-04-16
Supplement: Supplementary file [file media-3.pdf]

| <b>Database searched</b>                          | <b>Number of retrieved references</b> |
|---------------------------------------------------|---------------------------------------|
| Medline (Ovid):                                   | 307                                   |
| Embase (Ovid):                                    | 378                                   |
| ERIC (Ovid)                                       | 145                                   |
| PsycInfo (Ovid):                                  | 390                                   |
| CINAHL (Ebsco):                                   | 447                                   |
| Scopus                                            | 835                                   |
| Web of Science (WoS)                              | 509                                   |
| OpenGrey (with duplicates)                        | 212                                   |
| WALTHAM Scientific Publications                   | 31                                    |
|                                                   | 95                                    |
| <b>Number of references before deduplication:</b> | <b>3759</b>                           |
| <b>Number of references after deduplication:</b>  | <b>2431</b>                           |
