# Supplementary material for: Animals in higher education settings: Do animal-assisted interventions improve mental and cognitive health outcomes of students? A systematic review and meta-analysis
Source: bioRxiv or medRxiv preprint supplement (doi:10.1101/2022.04.11.22273607), 2022-04-16
Supplement: Supplementary file [file media-5.pdf]

| Reference                        | Outcomes included in meta-analysis | Input used („esc“ function used)                               | Hedges' g and SE                                    |
|----------------------------------|------------------------------------|----------------------------------------------------------------|-----------------------------------------------------|
| Banks et al. (2018)              | Chronic self-perceived stress      | means and sds (esc_mean_sd)                                    | Chronic self-perceived stress: g= -0.411, SE= 0.27  |
|                                  | Acute anxiety                      |                                                                | Acute anxiety: g= -0.52, SE= 0.272                  |
|                                  | Positive affect                    |                                                                | Positive affect: g= -0.104, SE= 0.268               |
|                                  | Negative affect                    |                                                                | Negative affect: g= -0.011, SE= 0.267               |
| Binfet et al. (2017)             | Chronic self-perceived stress      | means and sds (esc_mean_sd)                                    | g= -0.326, SE= 0.162                                |
| Crossman et al. (2015)           | Acute anxiety                      | means and sds (esc_mean_sd)                                    | Acute anxiety: g= -1.245, SE= 0.331                 |
|                                  | Positive affect                    |                                                                | Negative affect: g= -1.391, SE=0.337                |
|                                  | Negative affect                    |                                                                | Positive affect: g= 0.564, SE= 0.308                |
| Crump et al. (2015) - Study I    | Systolic blood pressure            | f-test (esc_f)                                                 | Systolic blood pressure: g= 0.814, SE= 0.402        |
| McDonald et al. (2017)           | Systolic blood pressure            | means and sds (esc_mean_sd)                                    | g= -2.501, SE= 0.389                                |
| Shearer et al. (2015)            | Acute anxiety                      | means and sds at time point 4 (esc_mean_sd)                    | Acute anxiety: g= -0.811, SE= 0.328                 |
|                                  | Negative affect                    |                                                                | Negative affect: g= -0.612, SE= 0.322               |
| Ward-Griffin et al. (2018) - RCT | Positive affect                    | means and sds (esc_mean_sd)                                    | Positive affect: g= -0.088, SE= 0.128               |
|                                  | Negative affect                    |                                                                | Negative affect: g= -0.081, SE= 0.127               |
|                                  | Chronic self-perceived stress      |                                                                | Chronic self-perceived stress: g= -0.128, SE= 0.128 |
| Wilson (1987)                    | Systolic blood pressure            | means and sds (esc_mean_sd) (intervention vs. reading quietly) | Systolic blood pressure: g= 0.21, SE= 0.21          |
|                                  | Acute anxiety                      |                                                                | Acute anxiety: g= 0.0413, SE= 0.209                 |
