# Supplementary material for: Animals in higher education settings: Do animal-assisted interventions improve mental and cognitive health outcomes of students? A systematic review and meta-analysis
Source: bioRxiv or medRxiv preprint supplement (doi:10.1101/2022.04.11.22273607), 2022-04-16
Supplement: Supplementary file [file media-6.pdf]

| <b>Reference</b>                       | <b>Gender</b>          | <b>Location</b> | <b>Type of intervention condition</b> | <b>Type of control condition</b>  | <b>Stressor?<sup>a</sup></b> | <b>Format<sup>b</sup></b> | <b>Frequency of sessions<sup>c</sup></b> | <b>Duration of sessions (mins)</b> |
|----------------------------------------|------------------------|-----------------|---------------------------------------|-----------------------------------|------------------------------|---------------------------|------------------------------------------|------------------------------------|
| Banks et al. (2018) (113)              | Mostly female          | USA             | Active                                | No treatment                      | Before exams                 | Group                     | 1                                        | 10                                 |
| Barker et al. (2016) (114)             | Mostly female          | USA             | Active                                | No treatment                      | Before exams                 | Group                     | 1                                        | 15                                 |
| Barker et al. (2017) (115)             | Mostly female          | USA             | Active                                | No treatment                      | Before exams                 | Group                     | 1                                        | 15                                 |
| Binfet et al. (2017) (126)             | Mostly female          | Canada          | Active                                | No treatment                      | No                           | Group                     | 1                                        | 20                                 |
| Caparelli et al. (2020) (48)           | Mostly female          | USA             | Passive                               | No treatment                      | No                           | Individual                | 1                                        | 6                                  |
| Charnetski et al. (2004) (110)         | n/s <sup>4</sup>       | USA             | Active                                | (1) animal, (2) no treatment      | No                           | Individual                | 1                                        | 18                                 |
| Crossman et al. (2015) (116)           | Half male, half female | USA             | Active                                | (1) animal, (2) no treatment      | No                           | Individual                | 1                                        | 7                                  |
| Crump et al. (2015) - Study I (102)    | All female             | USA             | Active                                | No treatment                      | Before exams                 | Group                     | 1                                        | 15                                 |
| Crump et al. (2015) - Study II (102)   | All female             | USA             | Active                                | No treatment                      | Before exams                 | Group                     | 1                                        | 30                                 |
| Fiocco & Hunse (2017) (105)            | Mostly female          | Canada          | Active                                | No treatment                      | Yes                          | Individual                | 1                                        | 10                                 |
| Gebhart et al. (2019) (127)            | Mostly female          | Austria         | Active                                | (1 and 2) other, (3) no treatment | Before exams                 | Group                     | >1                                       | 45                                 |
| Gee et al. (2014) (106)                | Mostly female          | USA             | Passive                               | (1) human, (2) animal             | Yes                          | Individual                | 1                                        | 3                                  |
| Gee et al. (2015) (117)                | Mostly female          | USA             | Passive                               | (1 and 2) human, (3) no treatment | Yes                          | Individual                | 1                                        | 3                                  |
| Gee et al. (2019) - Experiment 1 (104) | Mostly female          | USA             | Active                                | (1) animal, (2) no treatment      | Yes                          | Individual                | 1                                        | 5                                  |
| Gee et al. (2019) - Experiment 2 (104) | Mostly female          | USA             | Active                                | (1) animal, (2) no treatment      | Yes                          | Individual                | 1                                        | 5                                  |
| Gonzalez-Ramirez et al. (2016) (130)   | Half male, half female | Mexico          | Active                                | No treatment                      | Yes                          | Group                     | n/s                                      | n/s                                |
| Grajfoner et al. (2017) (128)          | Mostly female          | Scotland        | Active                                | (1) animal, (2) human             | No                           | Group                     | 1                                        | 20                                 |

|                                                |                        |             |         |                                    |              |                               |     |     |
|------------------------------------------------|------------------------|-------------|---------|------------------------------------|--------------|-------------------------------|-----|-----|
| Hall (2018) (118)                              | Mostly female          | USA         | Active  | No treatment                       | No           | Group or individual           | n/s | n/s |
| Hunt & Chizkov (2014) (109)                    | Mostly female          | USA         | Passive | (1 and 2) no treatment             | Yes          | Individual                    | >1  | 20  |
| Kobayashi et al. (2017) (129)                  | Mostly female          | Japan       | Active  | Animal                             | No           | Individual                    | 1   | 1   |
| McDonald et al. (2017) (119)                   | n/s                    | USA         | Active  | No treatment                       | Before exams | Group                         | 1   | 15  |
| Pendry & Vandagriff (2019) (120)               | Mostly female          | USA         | Active  | (1) animal, (2 and 3) no treatment | Before exams | Dogs: group, cats: individual | 1   | 10  |
| Pendry et al. (2018) (121)                     | Mostly female          | USA         | Active  | (1) animal, (2) no treatment       | Before exams | Dogs: group, cats: individual | 1   | 10  |
| Pendry et al. (2019) (122)                     | Mostly female          | USA         | Active  | (1 and 2) other                    | No           | Group                         | >1  | 60  |
| Pendry et al. (2019, Clinical depression) (60) | Mostly female          | USA         | Active  | (1) animal, (2) no treatment       | Before exams | Dogs: group, cats: individual | 1   | 10  |
| Pendry et al. (2020) (36)                      | Mostly female          | USA         | Active  | (1 and 2) other                    | No           | Group                         | >1  | 60  |
| Polheber & Matchock (2014) (108)               | Half male, half female | USA         | Passive | (1) human, (2) no treatment        | Yes          | Individual                    | 1   | 53  |
| Shearer et al. (2015) (123)                    | Half male, half female | USA         | Active  | (1) other, (2) no treatment        | No           | Group                         | >1  | 60  |
| Stewart & Strickland (2013) (107)              | Mostly female          | USA         | Passive | No treatment                       | Yes          | Individual                    | 1   | 14  |
| Straatman et al. (1997) (111)                  | All male               | Netherlands | Passive | No treatment                       | Yes          | Individual                    | 1   | 36  |
| Trammell (2017) - Study 2 (103)                | n/s                    | USA         | Active  | Animal                             | Before exams | Group                         | 1   | 15  |
| Trammell (2017) - Study 3 (103)                | n/s                    | USA         | Active  | Animal                             | Before exams | Group                         | 1   | 15  |
| Trammell (2019) (124)                          | Mostly female          | USA         | Passive | No treatment                       | Yes          | Group                         | >1  | n/s |
| Ward-Griffin et al. (2018) (125)               | Mostly female          | Canada      | Active  | No treatment                       | No           | Group                         | 1   | 30  |
| Wilson (1987) (112)                            | Mostly female          | USA         | Active  | (1) other, (2) no treatment        | No           | Individual                    | 1   | 10  |
