# Supplementary material for: Animals in higher education settings: Do animal-assisted interventions improve mental and cognitive health outcomes of students? A systematic review and meta-analysis
Source: bioRxiv or medRxiv preprint supplement (doi:10.1101/2022.04.11.22273607), 2022-04-16
Supplement: Supplementary file [file media-8.pdf]

| Reference                               | Outcome                       | Effect of adhering to intervention?  | Randomization process | Deviations from intended interventions | Missing outcome data | Measurement of the outcome | Selection of the reported result | Overall Bias  |
|-----------------------------------------|-------------------------------|--------------------------------------|-----------------------|----------------------------------------|----------------------|----------------------------|----------------------------------|---------------|
| <b>Banks et al. (2018)</b>              | Chronic self-perceived stress | Effect of assignment to intervention | Some concerns         | Low risk                               | Low risk             | Some concerns              | Low risk                         | Some concerns |
| Banks et al. (2018)                     | Positive and negative affect  | Effect of assignment to intervention | Some concerns         | Low risk                               | Low risk             | Some concerns              | Low risk                         | Some concerns |
| Banks et al. (2018)                     | Acute anxiety                 | Effect of assignment to intervention | Some concerns         | Low risk                               | Low risk             | Some concerns              | Low risk                         | Some concerns |
| <b>Binfet et al. (2017)</b>             | Chronic self-perceived stress | Effect of assignment to intervention | Some concerns         | Low risk                               | Some concerns        | Some concerns              | Low risk                         | Some concerns |
| <b>Caparelli et al. (2020)</b>          | Memory test                   | Effect of assignment to intervention | Some concerns         | Some concerns                          | Low risk             | Low risk                   | Some concerns                    | Some concerns |
| <b>Crossman et al. (2015)</b>           | Acute anxiety                 | Effect of assignment to intervention | Some concerns         | Low risk                               | Low risk             | Some concerns              | Low risk                         | Some concerns |
| Crossman et al. (2015)                  | Positive and negative affect  | Effect of assignment to intervention | Some concerns         | Low risk                               | Low risk             | Some concerns              | Low risk                         | Some concerns |
| <b>Crump et al. (2015) - Study II</b>   | Acute self-perceived stress   | Effect of assignment to intervention | Some concerns         | Low risk                               | Low risk             | Some concerns              | Low risk                         | Some concerns |
| Crump et al. (2015) - Study II          | Arousal                       | Effect of assignment to intervention | Some concerns         | Low risk                               | Low risk             | Some concerns              | Low risk                         | Some concerns |
| Crump et al. (2015) - Study II          | Chronic self-perceived stress | Effect of assignment to intervention | Some concerns         | Low risk                               | Low risk             | Some concerns              | Low risk                         | Some concerns |
| Crump et al. (2015) - Study II          | Salivary cortisol             | Effect of assignment to intervention | Some concerns         | Low risk                               | Low risk             | Low risk                   | Low risk                         | Some concerns |
| <b>Fiocco &amp; Hunse (2017)</b>        | Positive and negative affect  | Effect of assignment to intervention | Some concerns         | Low risk                               | Low risk             | Some concerns              | Low risk                         | Some concerns |
| <b>Gebhart et al. (2018)</b>            | Acute anxiety                 | Effect of assignment to intervention | Low risk              | Low risk                               | Some concerns        | Some concerns              | Low risk                         | Some concerns |
| Gebhart et al. (2018)                   | Acute self-perceived stress   | Effect of assignment to intervention | Low risk              | Low risk                               | Some concerns        | Some concerns              | Low risk                         | Some concerns |
| Gebhart et al. (2018)                   | Salivary cortisol             | Effect of assignment to intervention | Low risk              | Low risk                               | Some concerns        | Low risk                   | Low risk                         | Some concerns |
| <b>Gee et al. (2019) - Experiment 2</b> | Acute anxiety                 | Effect of assignment to intervention | Some concerns         | Low risk                               | Low risk             | Some concerns              | Low risk                         | Some concerns |
| Gee et al. (2019) - Experiment 2        | HR                            | Effect of assignment to intervention | Some concerns         | Low risk                               | Low risk             | Low risk                   | Low risk                         | Some concerns |
| Gee et al. (2019) - Experiment 2        | HRV                           | Effect of assignment to intervention | Some concerns         | Low risk                               | Low risk             | Low risk                   | Low risk                         | Some concerns |
| <b>Grajfoner et al. (2017)</b>          | Acute anxiety                 | Effect of assignment to intervention | Some concerns         | Low risk                               | Low risk             | Some concerns              | Low risk                         | Some concerns |
| <b>Hall (2018)</b>                      | Acute anxiety                 | Effect of assignment to intervention | Some concerns         | High risk                              | Some concerns        | Some concerns              | Low risk                         | High risk     |
| <b>Hunt &amp; Chizkov (2015)</b>        | Chronic depression            | Effect of assignment to intervention | Some concerns         | Low risk                               | Low risk             | Some concerns              | High risk                        | High risk     |
| Hunt & Chizkov (2015)                   | Acute anxiety                 | Effect of assignment to intervention | Some concerns         | Low risk                               | Low risk             | Some concerns              | High risk                        | High risk     |

|                                        |                              |                                      |               |               |               |               |               |               |
|----------------------------------------|------------------------------|--------------------------------------|---------------|---------------|---------------|---------------|---------------|---------------|
| Hunt & Chizkov (2015)                  | Positive and negative affect | Effect of assignment to intervention | Some concerns | Low risk      | Low risk      | Some concerns | High risk     | High risk     |
| <b>McDonald et al. (2017)</b>          | BP                           | Effect of assignment to intervention | Some concerns | Some concerns | Low risk      | Low risk      | Some concerns | Some concerns |
| <b>Pendry &amp; Vandagriff (2019)</b>  | Salivary cortisol            | Effect of assignment to intervention | Some concerns | Low risk      | Low risk      | Low risk      | Low risk      | Some concerns |
| <b>Pendry et al. (2018)</b>            | Acute anxiety                | Effect of assignment to intervention | High risk     | High risk     | High risk     | Low risk      | Low risk      | High risk     |
| Pendry et al. (2018)                   | Acute depression             | Effect of assignment to intervention | High risk     | High risk     | High risk     | Low risk      | Low risk      | High risk     |
| <b>Pendry et al. (2019)</b>            | Acute anxiety                | Effect of assignment to intervention | Some concerns | Low risk      | Low risk      | Some concerns | Low risk      | Some concerns |
| Pendry et al. (2019)                   | Acute depression             | Effect of assignment to intervention | Some concerns | Low risk      | Low risk      | Some concerns | Low risk      | Some concerns |
| <b>Polheber &amp; Matchock (2014)</b>  | HR                           | Effect of assignment to intervention | Some concerns | Low risk      | Low risk      | Low risk      | Low risk      | Some concerns |
| Polheber & Matchock (2014)             | Salivary cortisol            | Effect of assignment to intervention | Some concerns | Low risk      | Low risk      | Low risk      | Low risk      | Some concerns |
| Polheber & Matchock (2014)             | Acute anxiety                | Effect of assignment to intervention | Some concerns | Low risk      | Low risk      | Some concerns | Low risk      | Some concerns |
| <b>Shearer et al. (2015)</b>           | Acute anxiety                | Effect of assignment to intervention | Some concerns | Some concerns | Some concerns | Some concerns | Some concerns | Some concerns |
| Shearer et al. (2015)                  | Negative affect              | Effect of assignment to intervention | Some concerns | Some concerns | Some concerns | Some concerns | Some concerns | Some concerns |
| Shearer et al. (2015)                  | Chronic depression           | Effect of assignment to intervention | Some concerns | Some concerns | Some concerns | Some concerns | High risk     | High risk     |
| Shearer et al. (2015)                  | HRV                          | Effect of assignment to intervention | Some concerns | Some concerns | Low risk      | Low risk      | Low risk      | Some concerns |
| <b>Stewart &amp; Strickland (2013)</b> | Acute anxiety                | Effect of assignment to intervention | Some concerns | Low risk      | Low risk      | Low risk      | Some concerns | Some concerns |
| <b>Straatman et al. (1997)</b>         | HR                           | Effect of assignment to intervention | Some concerns | Low risk      | Low risk      | Low risk      | Low risk      | Some concerns |
| Straatman et al. (1997)                | BP                           | Effect of assignment to intervention | Some concerns | Low risk      | Low risk      | Low risk      | Low risk      | Some concerns |
| Straatman et al. (1997)                | Acute anxiety                | Effect of assignment to intervention | Some concerns | Low risk      | Low risk      | Some concerns | High risk     | High risk     |
| <b>Trammell (2017) - Study 2</b>       | Acute self-perceived stress  | Effect of assignment to intervention | Some concerns | Low risk      | Low risk      | Some concerns | Low risk      | Some concerns |
| Trammell (2017) - Study 2              | Memory test                  | Effect of assignment to intervention | Some concerns | Low risk      | Low risk      | Low risk      | Low risk      | Some concerns |
| <b>Trammell (2017) - Study 3</b>       | Acute self-perceived stress  | Effect of assignment to intervention | Some concerns | Low risk      | Low risk      | Some concerns | Low risk      | Some concerns |
| Trammell (2017) - Study 3              | Memory test                  | Effect of assignment to intervention | Some concerns | Low risk      | Low risk      | Low risk      | Low risk      | Some concerns |
| <b>Trammell (2019)</b>                 | Memory test                  | Effect of assignment to intervention | Some concerns | Low risk      | Low risk      | Low risk      | Some concerns | Some concerns |

|                                   |                               |                                      |               |          |               |               |               |               |
|-----------------------------------|-------------------------------|--------------------------------------|---------------|----------|---------------|---------------|---------------|---------------|
| Trammell (2019)                   | Happiness                     | Effect of assignment to intervention | Some concerns | Low risk | Low risk      | Some concerns | Some concerns | Some concerns |
| Trammell (2019)                   | Acute self-perceived stress   | Effect of assignment to intervention | Some concerns | Low risk | Low risk      | Some concerns | Some concerns | Some concerns |
| Trammell (2019)                   | Arousal                       | Effect of assignment to intervention | Some concerns | Low risk | Low risk      | Some concerns | Some concerns | Some concerns |
| <b>Ward-Griffin et al. (2018)</b> | Positive and negative affect  | Effect of assignment to intervention | Some concerns | Low risk | Low risk      | Low risk      | Low risk      | Some concerns |
| Ward-Griffin et al. (2018)        | Chronic self-perceived stress | Effect of assignment to intervention | Some concerns | Low risk | Low risk      | Low risk      | Low risk      | Some concerns |
| Ward-Griffin et al. (2018)        | Happiness                     | Effect of assignment to intervention | Some concerns | Low risk | Some concerns | Low risk      | Low risk      | Some concerns |
