# Supplementary material for: Animals in higher education settings: Do animal-assisted interventions improve mental and cognitive health outcomes of students? A systematic review and meta-analysis
Source: bioRxiv or medRxiv preprint supplement (doi:10.1101/2022.04.11.22273607), 2022-04-16
Supplement: Supplementary file [file media-10.pdf]

| Reference                               | Outcome                     | Effect of adhering to intervention?  | Randomization process | Bias arising from period and carryover effects | Deviations from intended interventions | Mising outcome data | Measurement of the outcome | Selection of the reported result | Overall Bias  |
|-----------------------------------------|-----------------------------|--------------------------------------|-----------------------|------------------------------------------------|----------------------------------------|---------------------|----------------------------|----------------------------------|---------------|
| <b>Barker et al. (2016)</b>             | Acute self-perceived stress | Effect of assignment to intervention | Some concerns         | Some concerns                                  | Low risk                               | Low risk            | Some concerns              | Low risk                         | Some concerns |
| <b>Crump et al. (2015) - Study I</b>    | Acute self-perceived stress | Effect of assignment to intervention | Some concerns         | Some concerns                                  | Low risk                               | Low risk            | Some concerns              | Low risk                         | Some concerns |
| Crump et al. (2015) - Study I           | Arousal                     | Effect of assignment to intervention | Some concerns         | Some concerns                                  | Low risk                               | Low risk            | Some concerns              | Low risk                         | Some concerns |
| Crump et al. (2015) - Study I           | BP                          | Effect of assignment to intervention | Some concerns         | Some concerns                                  | Low risk                               | Low risk            | Low risk                   | Low risk                         | Some concerns |
| Crump et al. (2015) - Study I           | HR                          | Effect of assignment to intervention | Some concerns         | Some concerns                                  | Low risk                               | Low risk            | Low risk                   | Low risk                         | Some concerns |
| <b>Gee et al. (2014)</b>                | HR                          | Effect of assignment to intervention | Some concerns         | Some concerns                                  | Low risk                               | Low risk            | Low risk                   | Low risk                         | Some concerns |
| Gee et al. (2014)                       | HRV                         | Effect of assignment to intervention | Some concerns         | Some concerns                                  | Low risk                               | Low risk            | Low risk                   | Low risk                         | Some concerns |
| <b>Gee et al. (2015)</b>                | HR                          | Effect of assignment to intervention | Some concerns         | Some concerns                                  | Low risk                               | Low risk            | Low risk                   | Low risk                         | Some concerns |
| Gee et al. (2015)                       | HRV                         | Effect of assignment to intervention | Some concerns         | Some concerns                                  | Low risk                               | Low risk            | Low risk                   | Low risk                         | Some concerns |
| Gee et al. (2015)                       | Memory test                 | Effect of assignment to intervention | Some concerns         | Some concerns                                  | Low risk                               | Low risk            | Low risk                   | Low risk                         | Some concerns |
| <b>Gee et al. (2019) - Experiment 1</b> | Happiness                   | Effect of assignment to intervention | Some concerns         | Some concerns                                  | Low risk                               | Low risk            | Some concerns              | Low risk                         | Some concerns |
| Gee et al. (2019) - Experiment 1        | HR                          | Effect of assignment to intervention | Some concerns         | Some concerns                                  | Low risk                               | Low risk            | Low risk                   | Low risk                         | Some concerns |
| Gee et al. (2019) - Experiment 1        | HRV                         | Effect of assignment to intervention | Some concerns         | Some concerns                                  | Low risk                               | Low risk            | Low risk                   | Low risk                         | Some concerns |
| <b>Kobayashi et al. (2017)</b>          | Arousal                     | Effect of assignment to intervention | Some concerns         | Some concerns                                  | Low risk                               | Low risk            | Some concerns              | Low risk                         | Some concerns |
| <b>Wilson (1987)</b>                    | BP                          | Effect of assignment to intervention | Some concerns         | Some concerns                                  | Low risk                               | Low risk            | Low risk                   | Low risk                         | Some concerns |
| Wilson (1987)                           | HR                          | Effect of assignment to intervention | Some concerns         | Some concerns                                  | Low risk                               | Low risk            | Low risk                   | Low risk                         | Some concerns |
| Wilson (1987)                           | Acute and chronic anxiety   | Effect of assignment to intervention | Some concerns         | Some concerns                                  | Low risk                               | Low risk            | Some concerns              | Low risk                         | Some concerns |
