# Supplementary material for: Animals in higher education settings: Do animal-assisted interventions improve mental and cognitive health outcomes of students? A systematic review and meta-analysis
Source: bioRxiv or medRxiv preprint supplement (doi:10.1101/2022.04.11.22273607), 2022-04-16

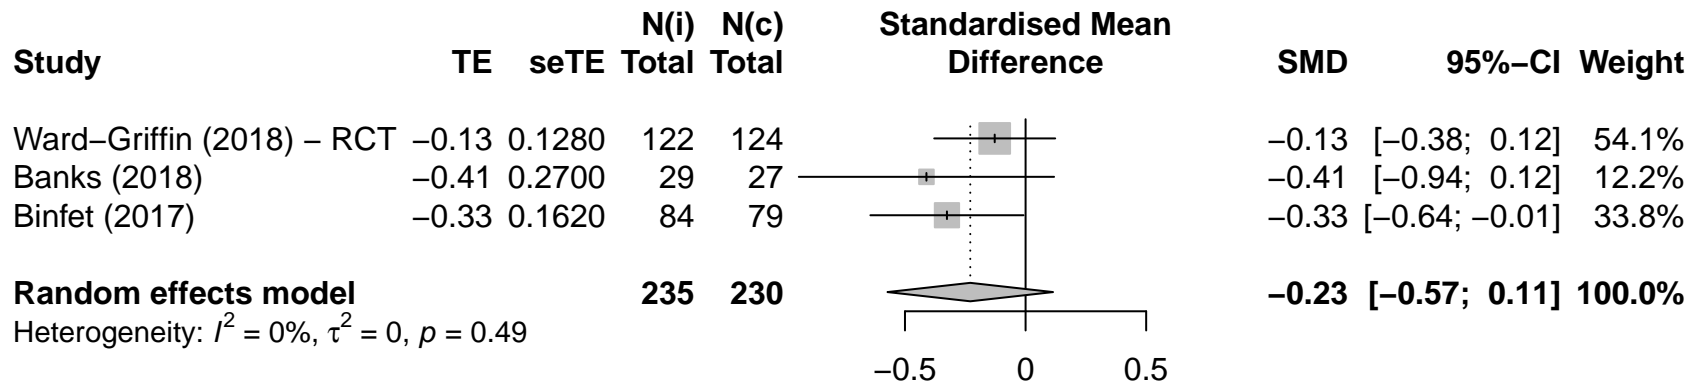

Supplement: Supplementary file [file media-11.pdf]
